# Supplementary material
Source: PubMed Central journal article supplement (PMC6699986)
Supplement: EMS83891-supplement-Suppl__Figures.pdf [file EMS83891-supplement-Suppl__Figures.pdf]

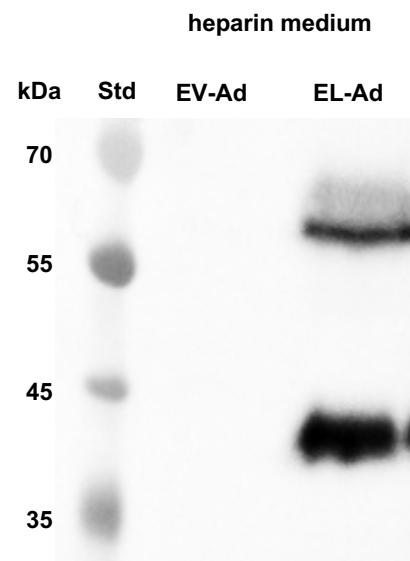

Suppl. Fig. S1

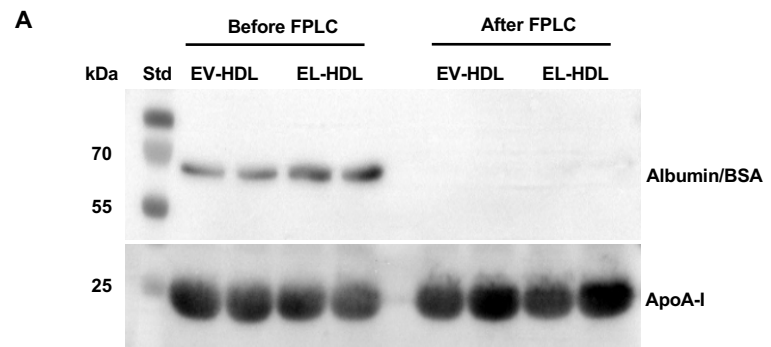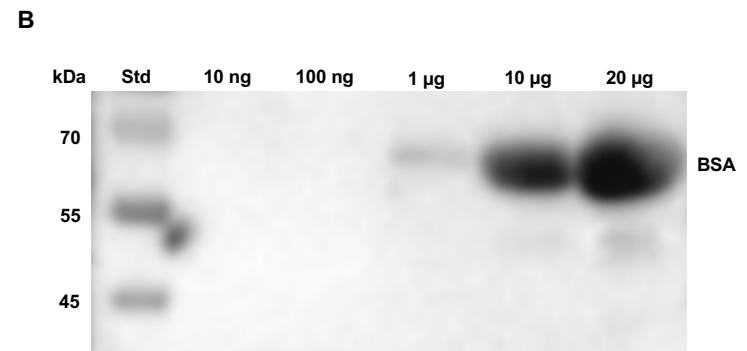

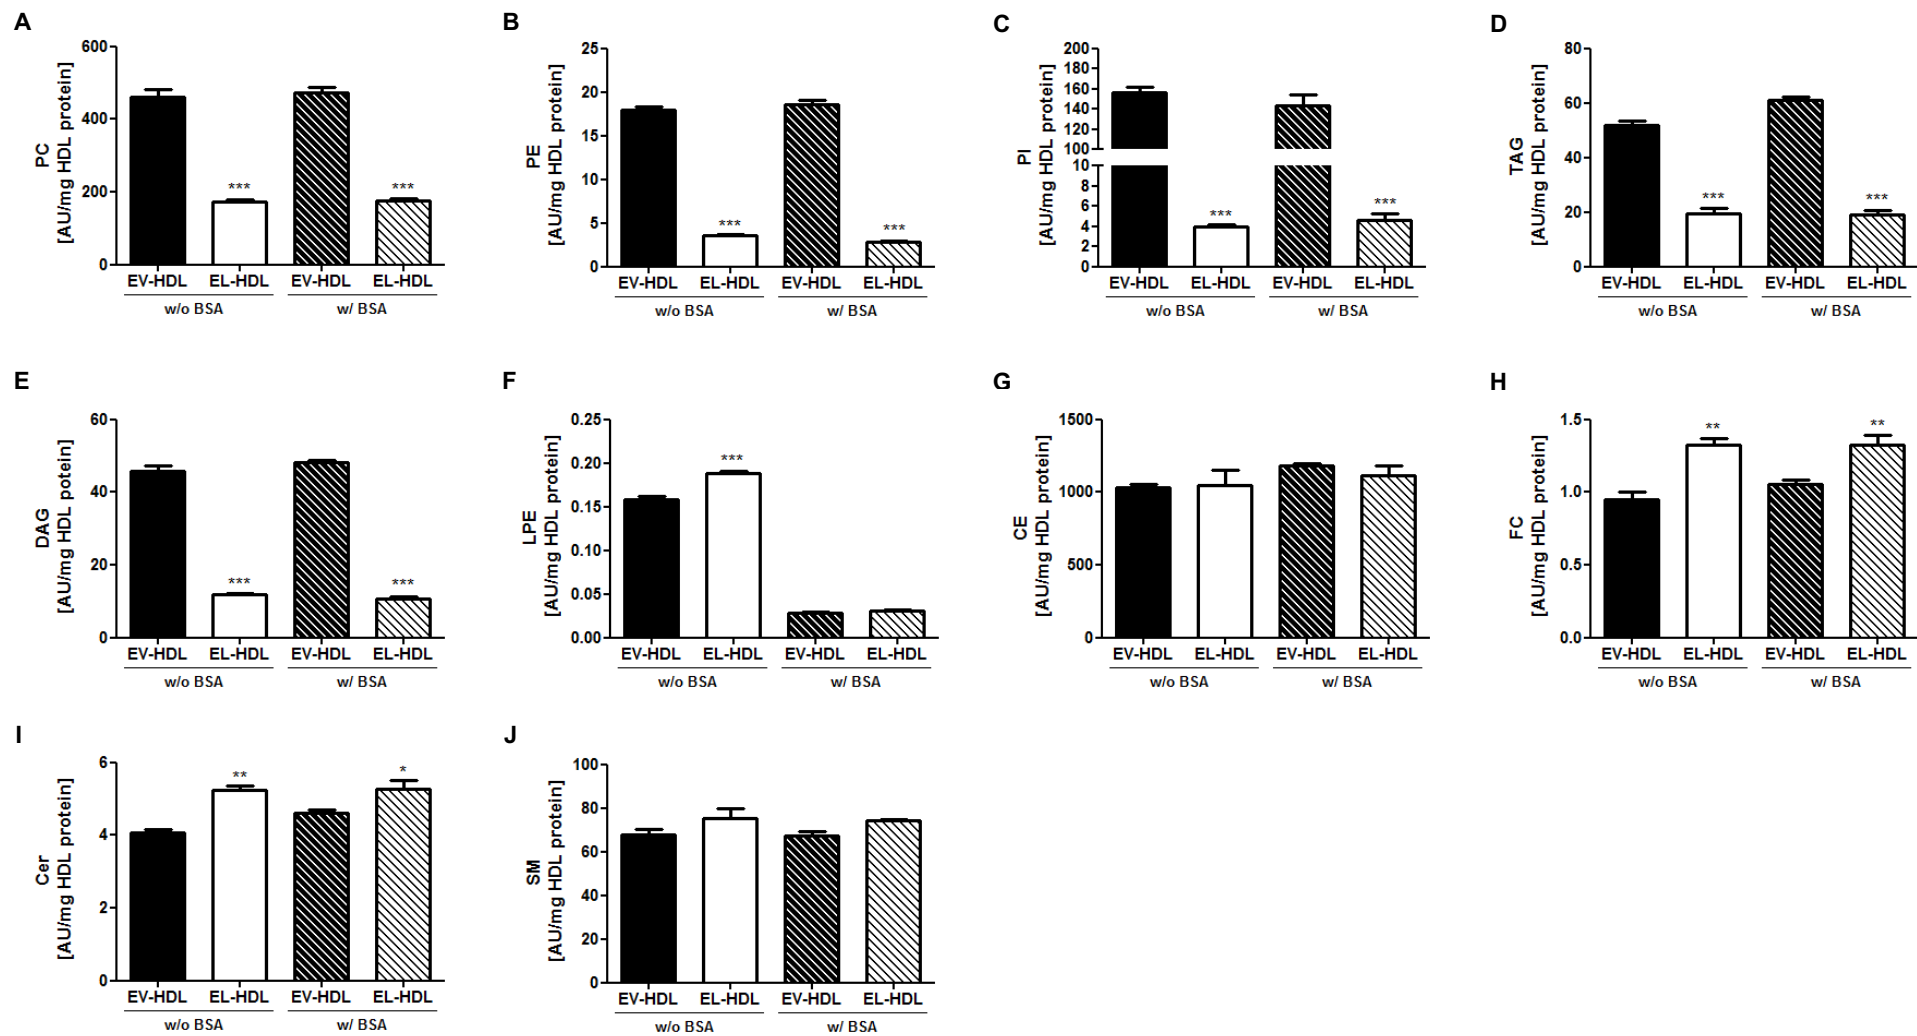

Suppl. Fig. S3

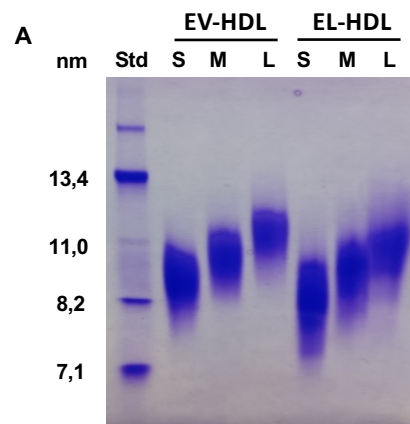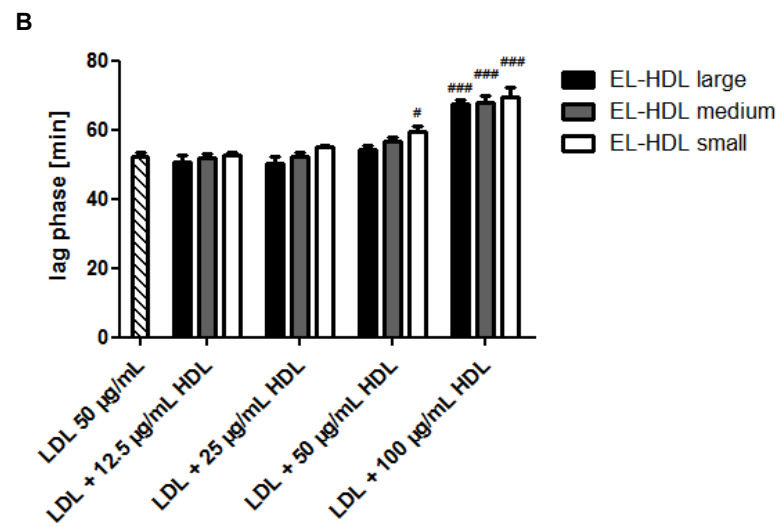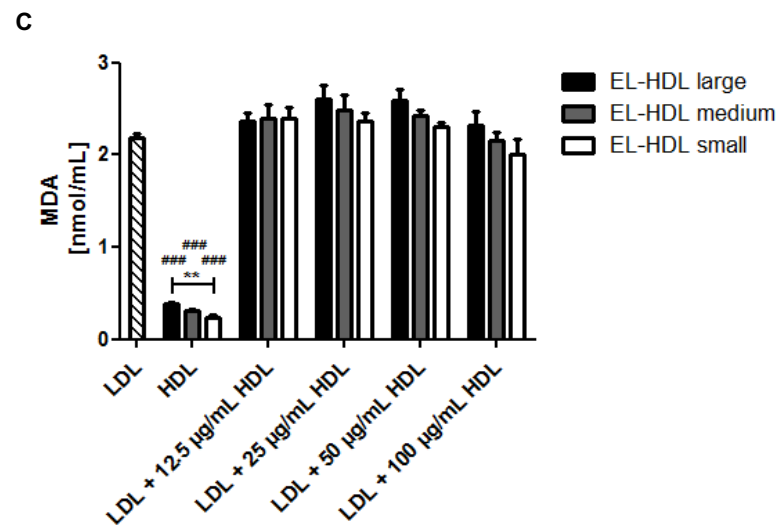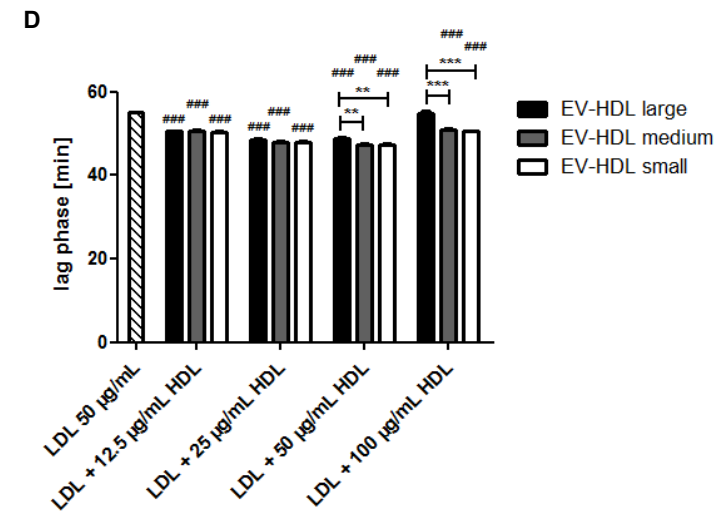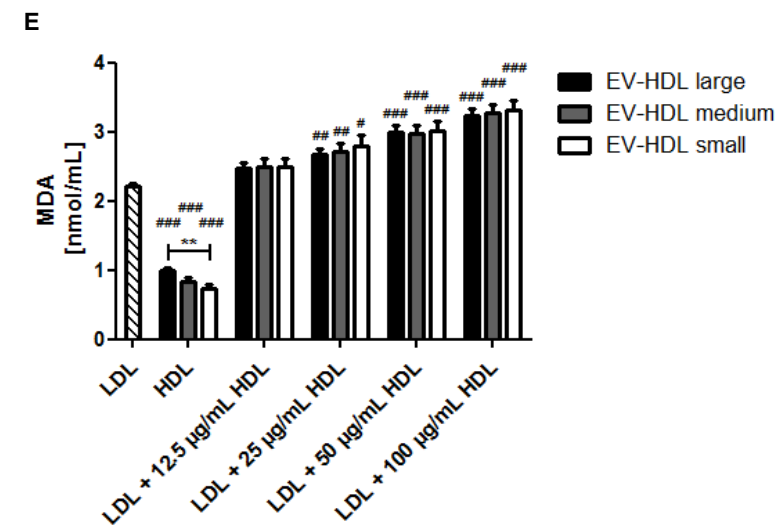

Suppl. Fig. S4

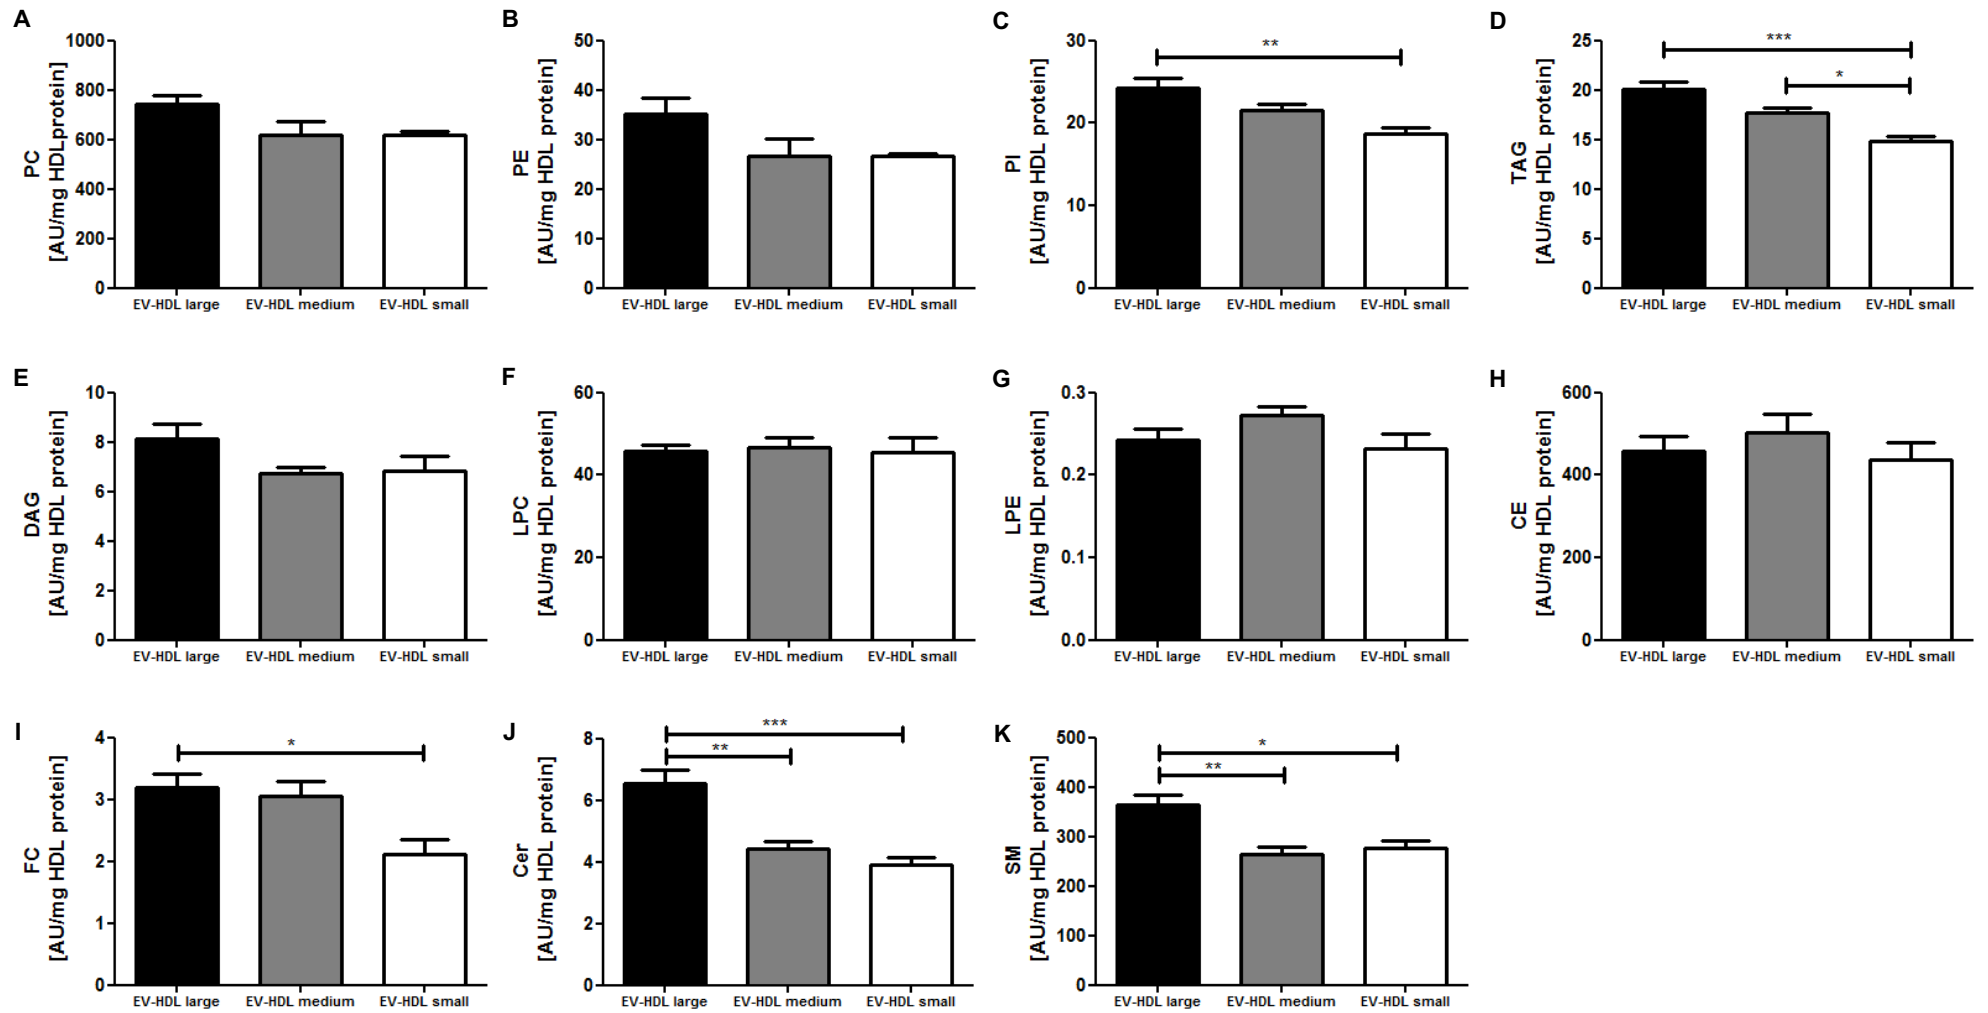

Suppl. Fig. S5

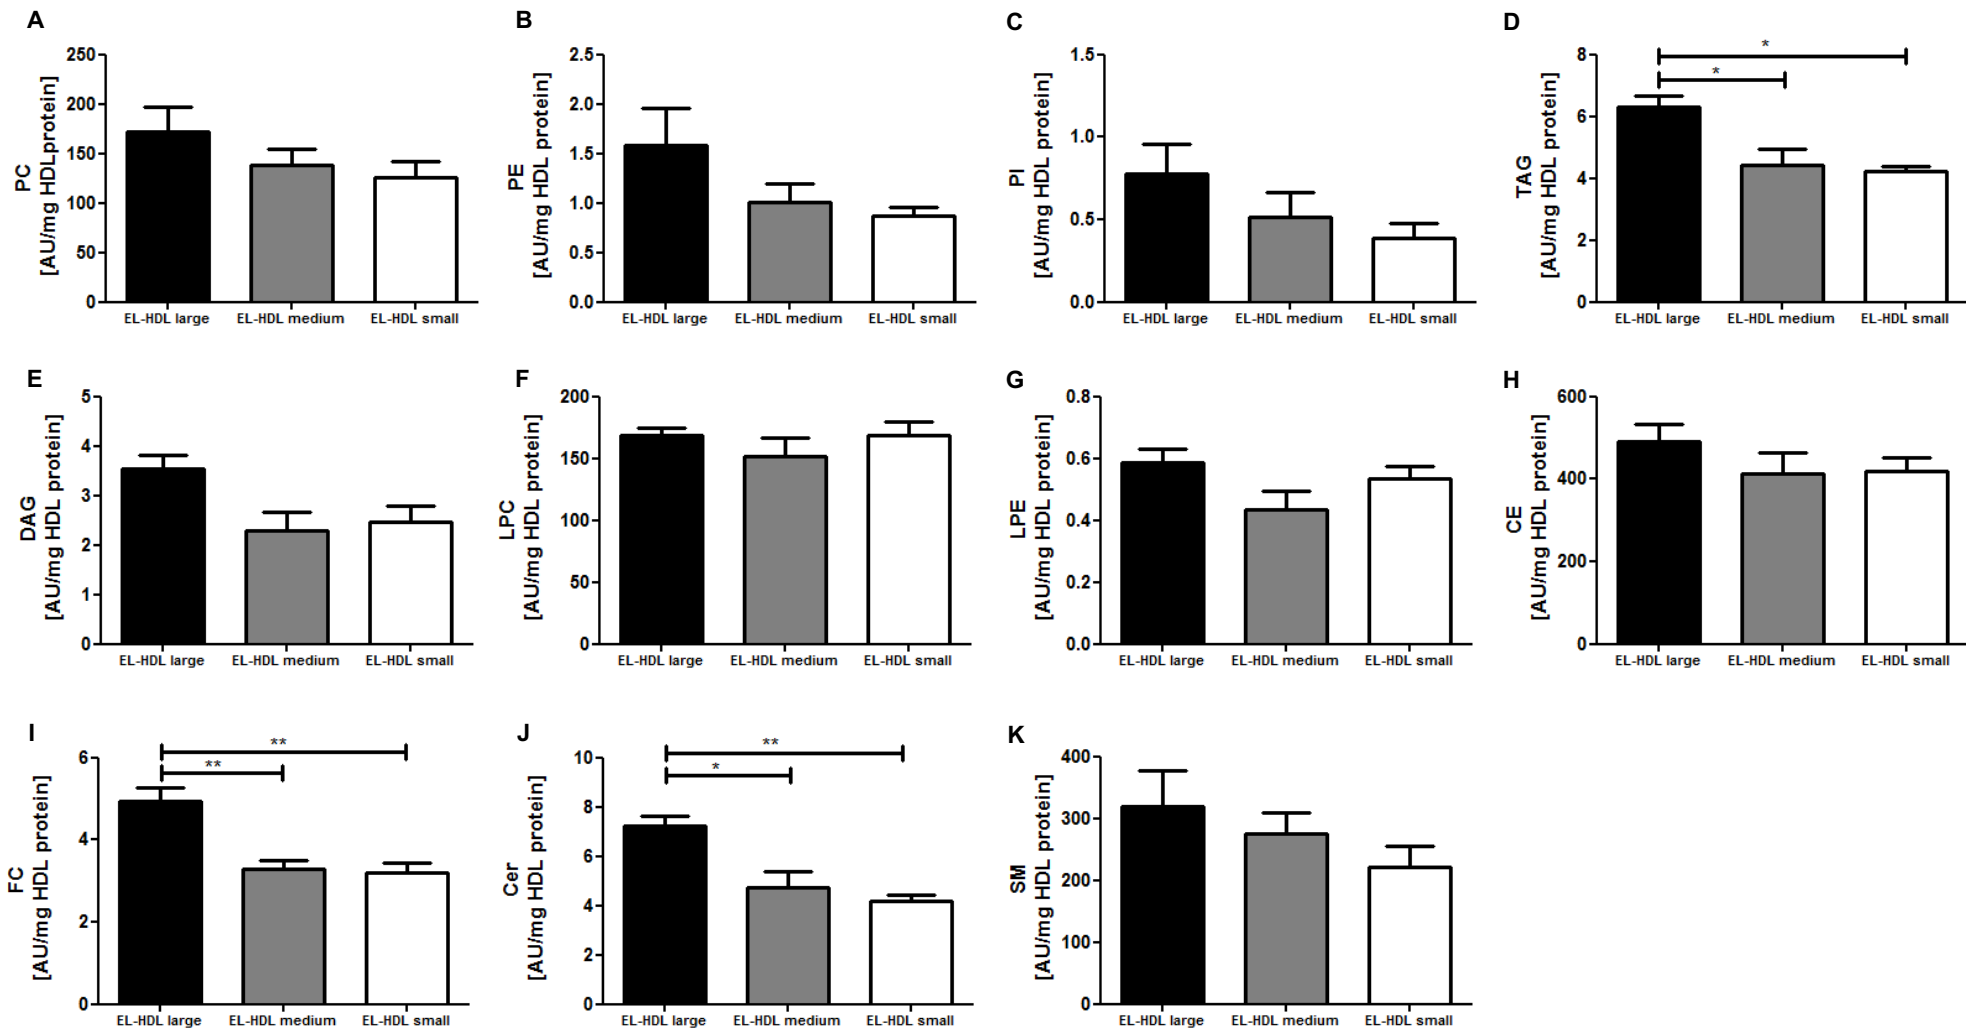

Suppl. Fig. S6

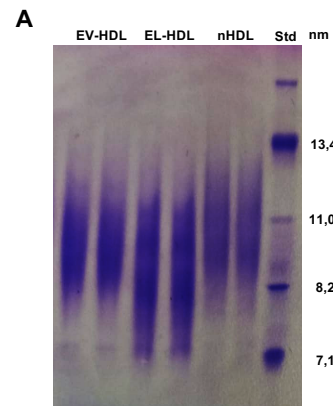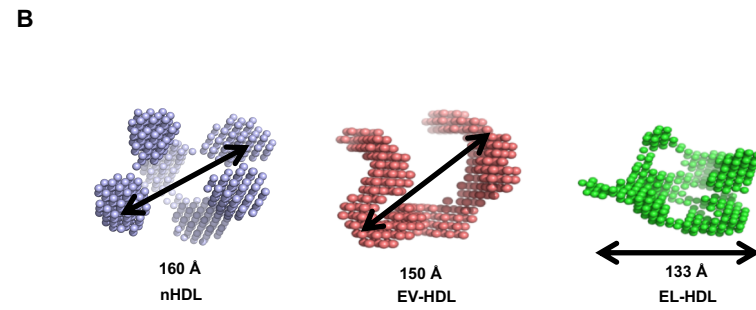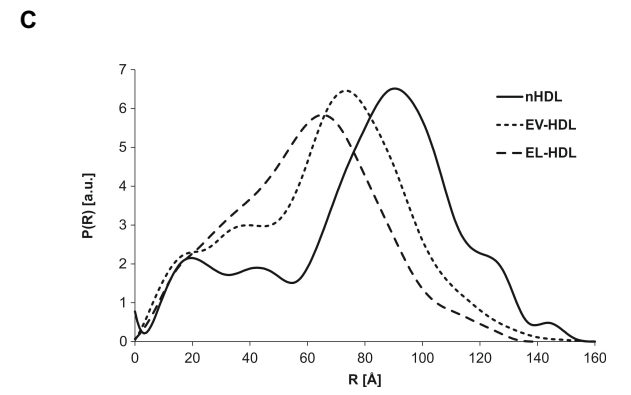

Suppl. Fig. S7

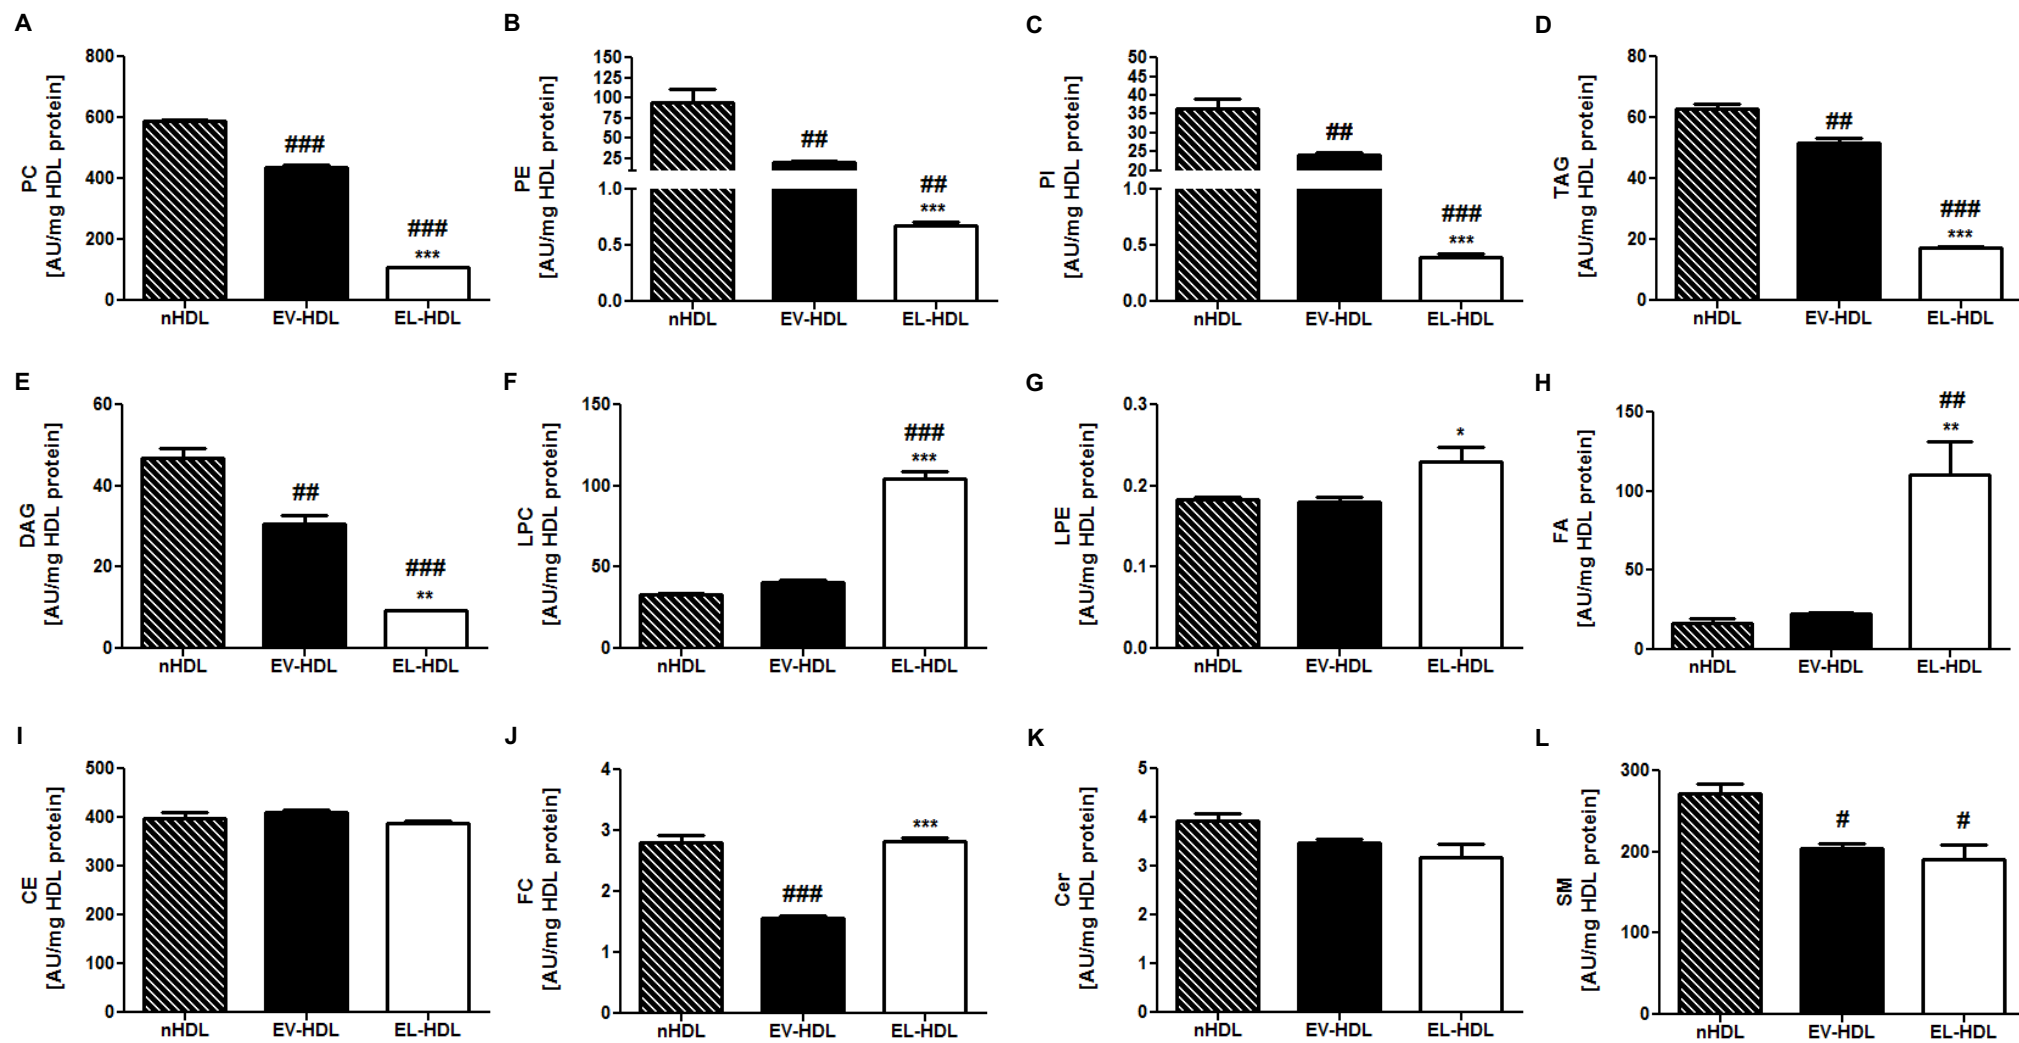

Suppl. Fig. S8



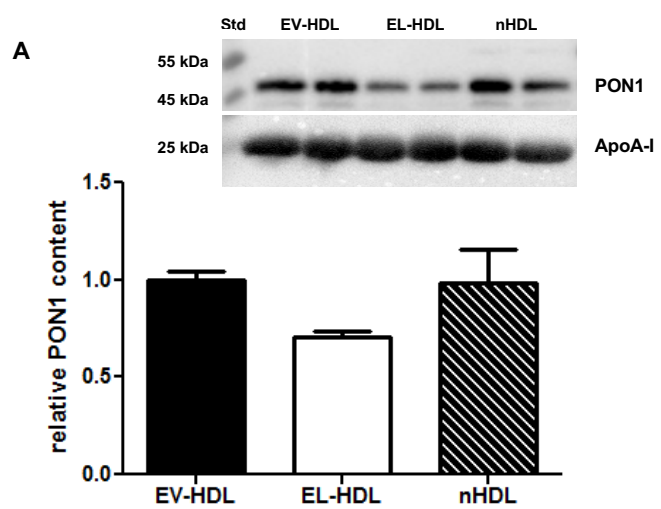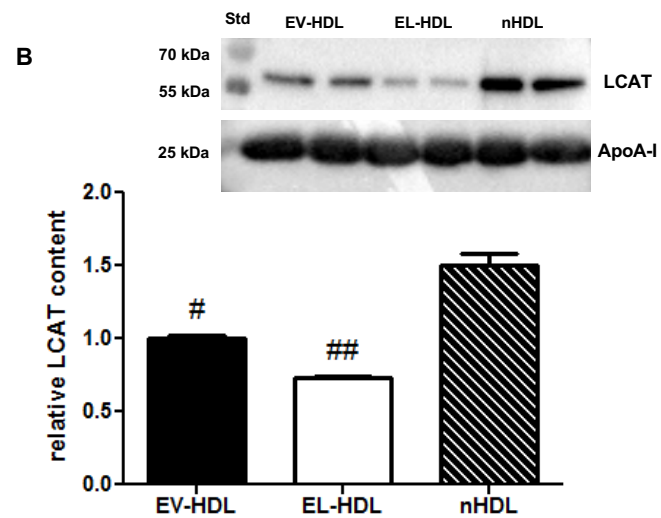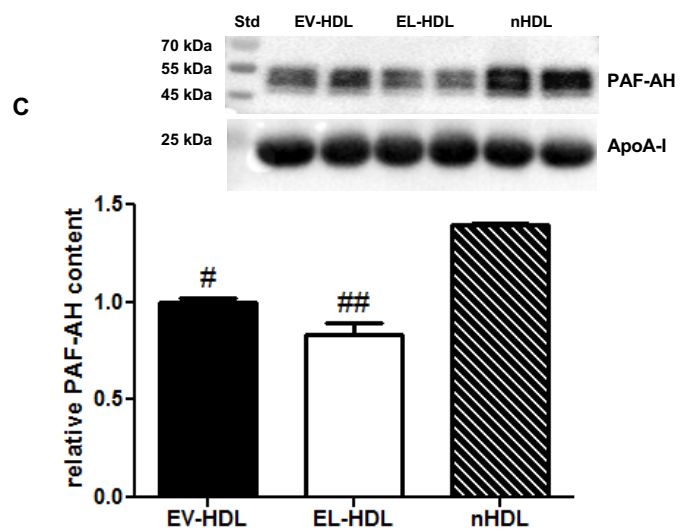

Suppl. Fig. S9

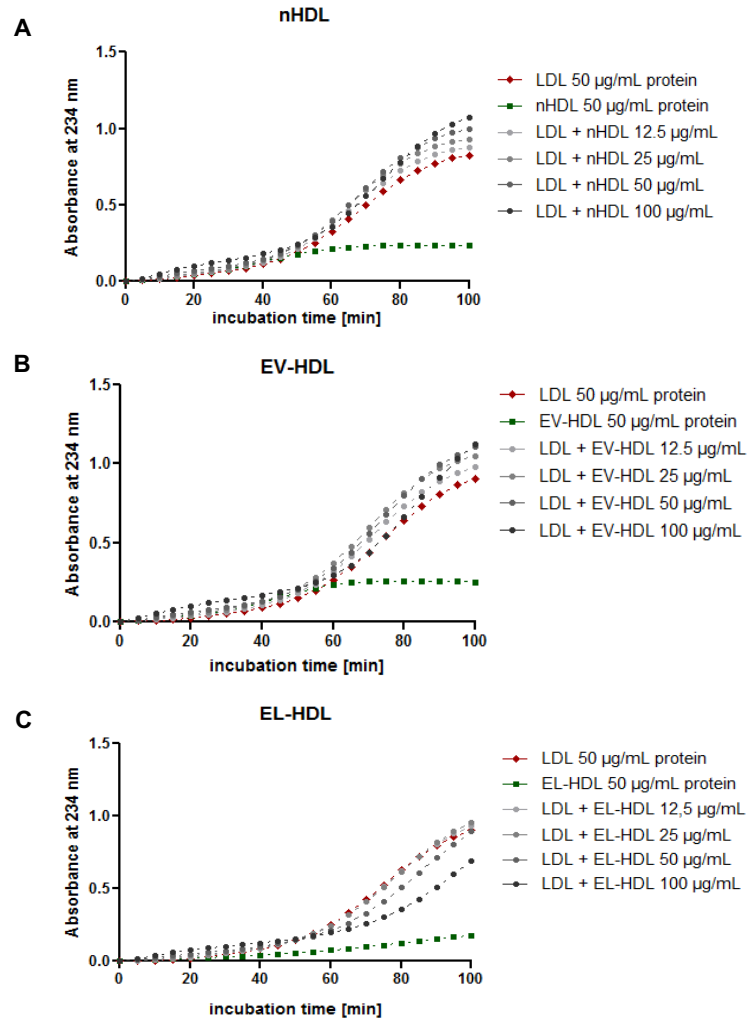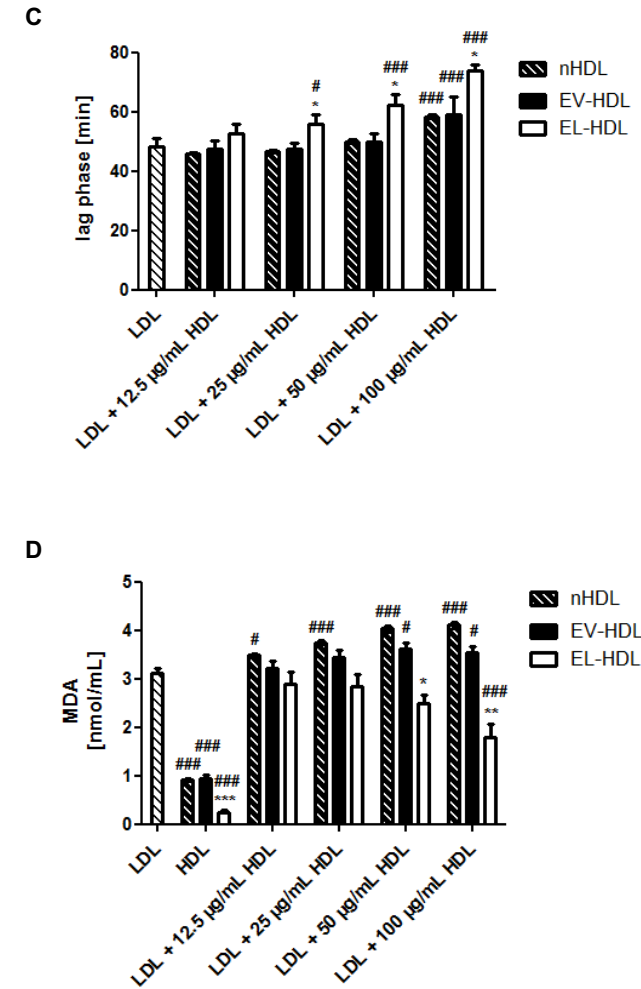

Suppl. Fig. S10

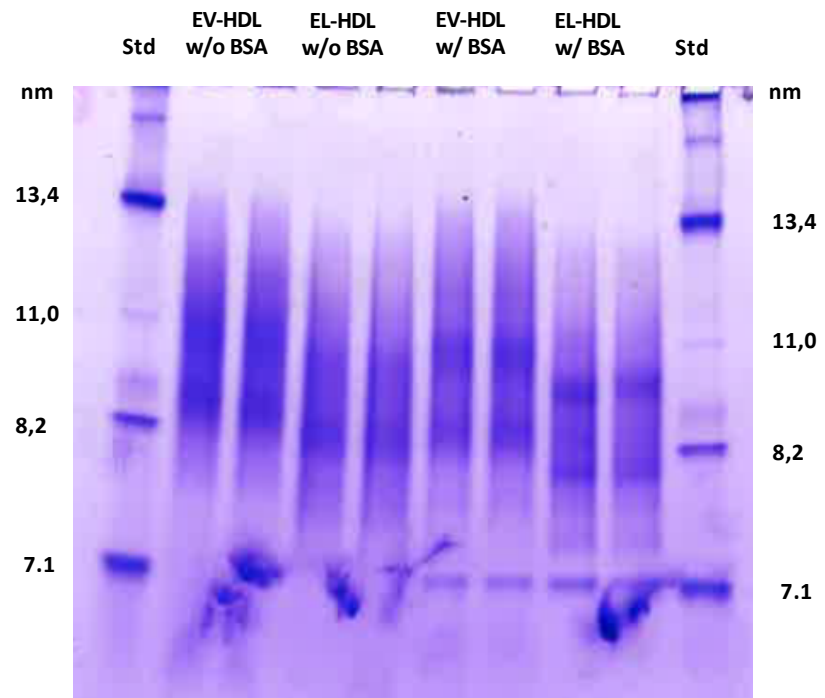

Suppl. Fig. S11
